**TITLE:** IS CONVENTIONAL VENTILATION (CV) ADEQUATE IN COPD PATIENTS DURING SINGLE-LUNG TRANSPLANTATION (SLT)?

**AUTHORS:** J. Rogers, M.D., T. Sharp, M.D., C. Hantler, M.D., J. Calhoun, M.D., R.F. Erian, M.D.

**AFFILIATION:** Dept. Anesth., Univ. Texas Health Science Center, San Antonio, TX 78284-7838

Although SLT has been reserved for patients with restrictive lung disease, it is now also considered for those with chronic obstructive pulmonary disease (COPD). Because of the degree of parenchymal damage in their native lungs, COPD patients ordinarily would not be candidates for thoracotomies involving single-lung ventilation (SLV). At this institution, SLT has been performed in 20 patients presenting with end-stage pulmonary disease. Out of these 20, COPD was noted to play a major role in one group of candidates. The purpose of this study was to determine if CV provided adequate oxygenation and ventilation in COPD patients undergoing SLT.

After obtaining Institutional Review Board approval, we reviewed the charts of 20 patients who underwent SLT from March 1988 to April 1990. Patients with FEV<sub>1</sub>/FVC ratios <60% met the criteria for having obstructive lung disease. ABG's were used to evaluate the adequacy of ventilation and oxygenation during post-induction double-lung ventilation (DLV) and during SLV. Adequate oxygenation was defined as an O<sub>2</sub> index >250. Adequate ventilation was defined as PaCO<sub>2</sub> ≤ 60 torr with pH >7.2. The mode of ventilation or ventilation use of cardiopulmonary bypass (CPB) was also noted.

COPD criteria were met in 8 patients. Alpha<sub>1</sub> antitrypsin deficiency was the primary disease in 5 patients, emphysematous disease in 2 patients, and 1 patient had idiopathic bronchiolitis obliterans. CV was achieved with an Ohmeda Modulus 2 ventilator

with tidal volumes of 12-15 cc/kg during DLV and 7.5-10 cc/kg during SLV. Ventilatory rates ranged from 6-10 during DLV and 15-20 during SLV. All patients had an O<sub>2</sub> index >300 intraoperatively.

As shown in the Table, CV was adequate for most patients. However, in Patients #6 and #7, CV was inadequate at the time of single-lung ventilation; requiring femoral/femoral bypass or jet ventilation at rates of 120/min, respectively. Both patients required preoperative supplemental oxygen at rest and had a PaCO<sub>2</sub> >60 on their preoperative ABG. FEV<sub>1</sub> and FEV<sub>1</sub>/FVC ratios do not appear to be predictive of the inability to adequately ventilate these patients with CV during SLV. The need for supplemental O<sub>2</sub> at rest and PaCO<sub>2</sub> >60 mm Hg preoperatively may be predictive of the need for alternative ventilatory management or CPB during SLV.

| Patient               | 1    | 2    | 3    | 4    | 5    | 6    | 7    | 8    |
|-----------------------|------|------|------|------|------|------|------|------|
| Age                   | 43   | 40   | 53   | 40   | 53   | 39   | 48   | 42   |
| Sex                   | M    | F    | M    | F    | F    | F    | F    | M    |
| Lung                  | L    | L    | L    | R    | R    | R    | L    | R    |
| Height (cm)           | 182  | 170  | 173  | 160  | 154  | 167  | 165  | 185  |
| Weight (kg)           | 85   | 62   | 50   | 56   | 41   | 56   | 58   | 53   |
| FEV <sub>1</sub> (l)  | 0.74 | 0.75 | 0.40 | 0.54 | 0.23 | 0.29 | 0.60 | 0.46 |
| FEV <sub>1</sub> /FVC | 0.28 | 0.60 | 0.19 | 0.36 | 0.21 | 0.30 | 0.27 | 0.21 |
| FiO <sub>2</sub>      | 0.21 | 0.21 | 0.21 | 0.21 | 0.21 | 0.35 | 0.25 | 0.21 |
| pH                    | 7.40 | 7.40 | 7.40 | 7.40 | 7.33 | 7.35 | 7.35 | 7.39 |
| PCO <sub>2</sub>      | 35   | 40   | 44   | 33   | 59   | 70   | 63   | 42   |
| PO <sub>2</sub>       | 74   | 59   | 78   | 56   | 77   | 75   | 81   | 42   |
| DLV-A                 |      |      |      |      |      |      |      |      |
| pH                    | 7.36 | 7.45 | 7.31 | 7.28 | 7.39 | 7.25 | 7.26 | 7.30 |
| PCO <sub>2</sub>      | 44   | 36   | 55   | 50   | 50   | 79   | 78   | 60   |
| SLV-B                 |      |      |      |      |      |      |      |      |
| pH                    | 7.32 | 7.42 | 7.40 | 7.27 | 7.39 | 7.19 | 7.17 | 7.23 |
| PCO <sub>2</sub>      | 43   | 34   | 40   | 44   | 50   | 91   | 94   | 54   |

## A1185

CAPSAICIN AND THE PULMONARY EFFECTS OF  
ENDOTRACHEAL INTUBATION.

M.Hogman B.S., X-Y. Hua Ph.D., R. Dueck M.D., T.Yaksh Ph.D.  
Anesthesia Research Laboratory, UCSD and VAMC  
La Jolla, CA 92093

**Introduction.** Endotracheal intubation during anesthesia increases the P(A-a)O<sub>2</sub> and volume of trapped gas (V<sub>tg</sub>) in the lung, suggesting an airway reflex response. We therefore examined the pulmonary responses to intubation following pretreatment with capsaicin, to determine whether tracheal sensory C-fiber afferents containing neuropeptides SP, NKA and CGRP are activated by this reflex.

**Method.** Sprague Dawley female rats were treated with capsaicin 50 mg/kg (n=9) or solvent (n=9) during halothane anesthesia (1). Two weeks later the groups were further divided. Halothane was delivered in 50% O<sub>2</sub>/N<sub>2</sub> by mask (n=4) or by endotracheal tube (n=5). The halothane concentration was varied from 0.5% to 2% in 0.5% increments. Body box FRC was measured with a glass body plethysmograph. Nitrogen (N<sub>2</sub>) washout FRC was obtained with a Raman scattering gas analyzer (Rascal™, Albion Instruments). V<sub>tg</sub> was derived from the difference between bodybox and N<sub>2</sub> washout FRC. Lung clearance index (LCI), the number of FRC's to reach <0.5%N<sub>2</sub> level in a N<sub>2</sub> washout, was calculated from: (minute volume • N<sub>2</sub> washout time) / N<sub>2</sub> FRC. Arterial

blood gases were obtained to determine P(A-a)O<sub>2</sub>. Following the experiments, spinal cord, tracheal, bronchial and lung levels of SP-, NKA- and CGRP-like immunoreactivity were determined by radioimmunoassay (RIA).

**Result.** SP, NKA and CGRP tissue content showed a 50% depletion in spinal cord and 75% depletion in trachea, bronchi and lung in capsaicin treated rats. LCI significantly improved in intubated rats by capsaicin pretreatment. Intubated capsaicin treated rats needed 3 FRC's to wash out the N<sub>2</sub>, just like the mask rats, while solvent treated intubated rats needed 4 FRC's (P<0.002). P(A-a)O<sub>2</sub> did not improve with capsaicin but remained at approximately 100mmHg higher for the intubated rats. The FRC's were not affected and V<sub>tg</sub> remained at 13% of bodybox FRC for 0.5% and 45% for 2% halothane anesthesia for the intubated rats.

**Discussion.** Capsaicin treated rats showed a significant depletion of neuropeptides (SP, NKA and CGRP) in airway and lung tissue. Capsaicin did block the ventilatory inhomogeneity seen in the solvent treated intubated rats. It did not improve either the P(A-a)O<sub>2</sub> or V<sub>tg</sub>. We speculate this was due to either an incomplete depletion of neuropeptide mediators, or neuropeptides are not the sole mediators of this reflex.

1). Gamse et al. 1981 Neurosci 6 : 437-441.
